# Supplementary material for: AnchorFCI: harnessing genetic anchors for enhanced causal discovery of cardiometabolic disease pathways
Source: PubMed Central journal article supplement (PMC11663939; doi:10.3389/fgene.2024.1436947), 2024-12-09
Supplement: DataSheet1.pdf [file DataSheet1.pdf]

## Supplementary Material

### 1 COMPARATIVE STUDY BETWEEN RFCI AND ANCHOR FCI

**Table S1.** Comparison of RFCI and anchorFCI performance in learning the structure among the variables of interest and all three potential anchors. Scores represent the difference between the SHD of the inferred PAG relative to the true MAG and the SHD of the true PAG relative to the true MAG. Values are averages across 50 randomly generated MAGs, each evaluated on 30 datasets with varying sample sizes  $N$ . #Anchors indicates the average number of selected reliable anchors by anchorFCI. Smaller scores indicate higher accuracy, with zero indicating performance equivalent to the true PAG and negative scores suggesting greater informativeness beyond the MEC. P-values are from a one-sided Wilcoxon test with alternative hypothesis that the average difference between RFCI and anchorFCI scores (Diff) is greater than 0.

| N     | RFCI         |                 | AnchorFCI     |                 | Diff | P-Value                 |
|-------|--------------|-----------------|---------------|-----------------|------|-------------------------|
|       | [Min, Max]   | Mean $\pm$ SD   | [Min, Max]    | Mean $\pm$ SD   |      |                         |
| 500   | [3.03, 9.43] | 7.04 $\pm$ 1.46 | [-0.57, 5.67] | 3.49 $\pm$ 1.39 | 3.55 | $4.94 \times 10^{-248}$ |
| 1000  | [2.13, 7.17] | 5.64 $\pm$ 1.30 | [-1.33, 4.10] | 2.42 $\pm$ 1.32 | 3.22 | $5.43 \times 10^{-248}$ |
| 5000  | [1.37, 4.97] | 3.60 $\pm$ 0.96 | [-1.97, 2.87] | 0.77 $\pm$ 1.15 | 2.83 | $3.58 \times 10^{-251}$ |
| 10000 | [1.37, 4.50] | 3.07 $\pm$ 0.81 | [-2.50, 1.67] | 0.29 $\pm$ 1.01 | 2.78 | $3.61 \times 10^{-252}$ |

## 2 CAUSAL DISCOVERY USING THE CONSERVATIVE RFCI ALGORITHM

Figure S1 shows the Partial Ancestral Graph (PAG) obtained by employing the conservative RFCI algorithm with majority rule, excluding any genetic variables from consideration.

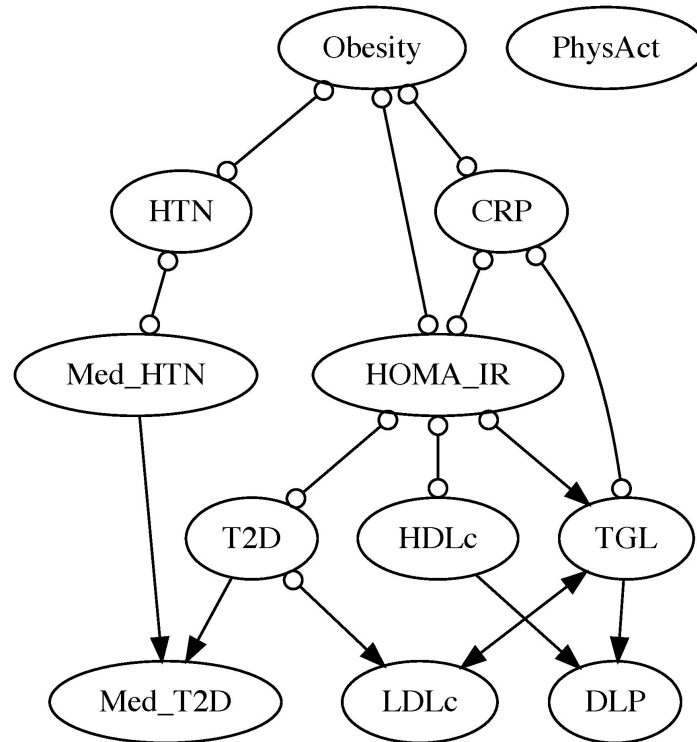

**Figure S1.** Partial Ancestral Graph inferred by the conservative RFCI algorithm with majority rule, *without using any SNP variables*. Directed edges imply ancestral (causal) relationships. Bidirected edges imply purely spurious associations. Circles indicate uncertain edge-marks, interchangeable with tail or arrowhead in equally probable models. Nodes representing various phenotypic traits include: Obesity, Type 2 Diabetes (T2D), Hypertension (HTN), Dyslipidemia (DLP), C-reactive protein (CRP), Homeostatic Model Assessment of Insulin Resistance (HOMA-IR), Triglycerides (TGL), Low-Density Lipoprotein Cholesterol (LDLc), High-Density Lipoprotein Cholesterol (HDLc), Medication for T2D (Med\_T2D), Medication for HTN (Med\_HTN), and Physical Activity (PhysAct).

Figure S2 shows the Partial Ancestral Graph (PAG) obtained by employing the conservative RFCI algorithm with majority rule, including the set of genetic variables from consideration.

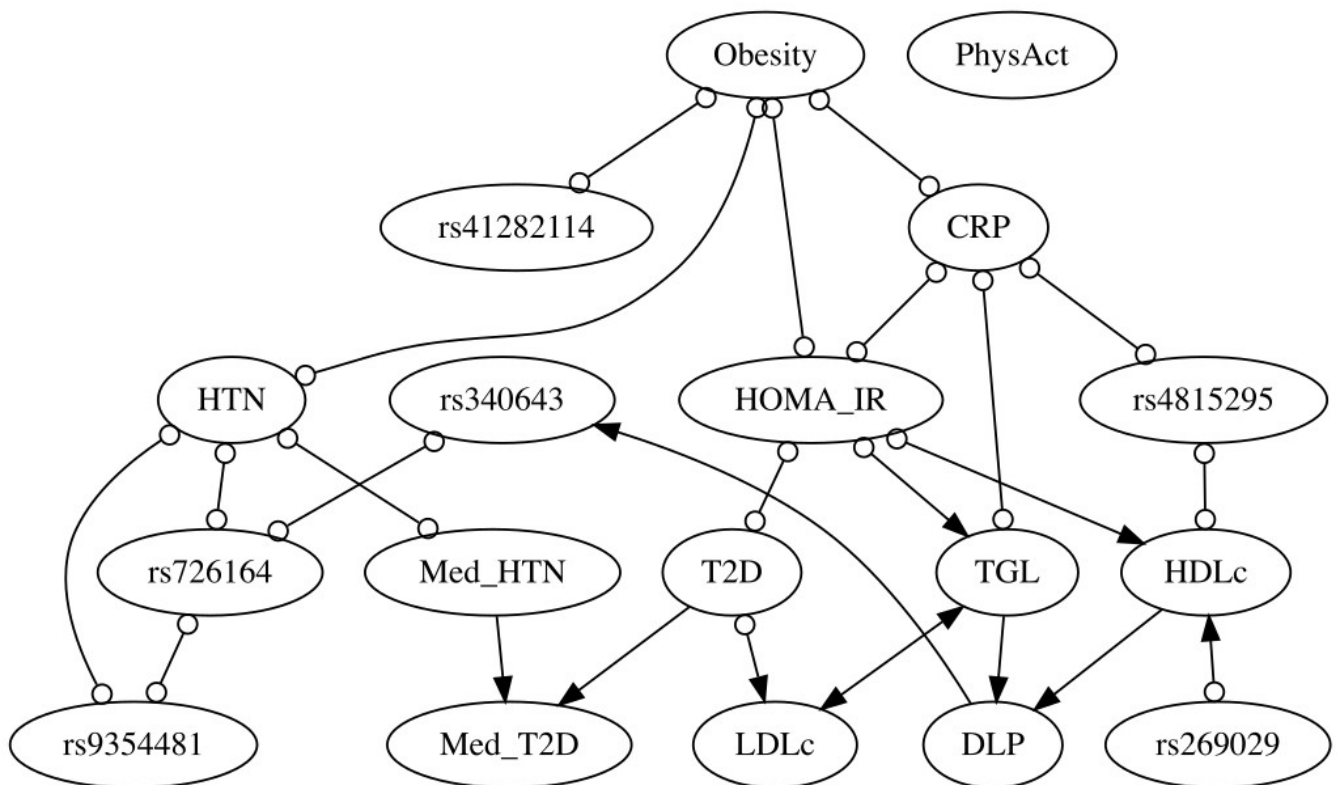

**Figure S2.** Partial Ancestral Graph inferred by the conservative RFCI algorithm with majority rule, including *SNP variables* are part of the general set of observed variables. Directed edges imply ancestral (causal) relationships. Bidirected edges imply purely spurious associations. Circles indicate uncertain edge-marks, interchangeable with tail or arrowhead in equally probable models. Nodes representing various phenotypic traits include: Obesity, Type 2 Diabetes (T2D), Hypertension (HTN), Dyslipidemia (DLP), C-reactive protein (CRP), Homeostatic Model Assessment of Insulin Resistance (HOMA-IR), Triglycerides (TGL), Low-Density Lipoprotein Cholesterol (LDLc), High-Density Lipoprotein Cholesterol (HDLc), Medication for T2D (Med\_T2D), Medication for HTN (Med\_HTN), and Physical Activity (PhysAct).

### 3 BOOSTRAPPED ANCHOR FCI RESULTS

**Table S2.** Percentages of inferred edge types across 50 bootstrap samples utilizing all considered phenotypes and genotypes. The percentages corresponding to the edge type inferred from the original dataset are highlighted in bold.

| Relationship         | $\emptyset$ | o—o | ←o | —o | o→ | ↔         | →         | o← | ←         | — |
|----------------------|-------------|-----|----|----|----|-----------|-----------|----|-----------|---|
| Obesity - HTN        | 38          | 16  | 6  | 0  | 2  | 0         | <b>24</b> | 0  | 14        | 0 |
| Obesity - CRP        | 4           | 2   | 8  | 0  | 2  | 16        | <b>46</b> | 0  | 22        | 0 |
| Obesity - HOMA-IR    | 0           | 0   | 0  | 0  | 0  | 4         | <b>88</b> | 0  | 8         | 0 |
| T2D - HOMA-IR        | 0           | 0   | 0  | 0  | 12 | 10        | 24        | 0  | <b>54</b> | 0 |
| T2D - LDLc           | 14          | 6   | 4  | 0  | 16 | 12        | <b>44</b> | 0  | 4         | 0 |
| T2D - Med T2D        | 0           | 2   | 0  | 0  | 20 | 42        | <b>36</b> | 0  | 0         | 0 |
| HTN - Med HTN        | 0           | 2   | 4  | 0  | 0  | 2         | <b>80</b> | 0  | 12        | 0 |
| DLP - HDLc           | 0           | 0   | 0  | 0  | 0  | 14        | 28        | 0  | <b>58</b> | 0 |
| DLP - TGL            | 0           | 0   | 0  | 0  | 0  | 6         | 10        | 0  | <b>84</b> | 0 |
| CRP - HOMA-IR        | 38          | 0   | 0  | 0  | 0  | 8         | <b>42</b> | 0  | 12        | 0 |
| CRP - TGL            | 52          | 0   | 0  | 0  | 0  | 10        | <b>16</b> | 0  | 22        | 0 |
| HOMA-IR - HDLc       | 42          | 0   | 0  | 0  | 0  | 20        | <b>26</b> | 0  | 12        | 0 |
| HOMA-IR - TGL        | 0           | 0   | 0  | 0  | 0  | 50        | <b>50</b> | 0  | 0         | 0 |
| LDLc - TGL           | 0           | 0   | 0  | 0  | 16 | <b>64</b> | 16        | 0  | 4         | 0 |
| Med T2D - Med HTN    | 0           | 0   | 4  | 0  | 0  | 36        | 2         | 0  | <b>58</b> | 0 |
| Obesity - rs41282114 | 8           | 0   | 86 | 0  | 0  | 6         | 0         | 0  | 0         | 0 |
| HTN - rs726164       | 0           | 0   | 40 | 0  | 0  | 54        | 0         | 0  | 6         | 0 |
| HTN - rs9354481      | 14          | 0   | 54 | 0  | 0  | 30        | 0         | 0  | 2         | 0 |
| DLP - rs340643       | 8           | 0   | 32 | 0  | 0  | 52        | 0         | 0  | 8         | 0 |
| CRP - rs4815295      | 38          | 0   | 26 | 0  | 0  | 28        | 0         | 0  | 8         | 0 |
| HDLc - rs269029      | 2           | 0   | 42 | 0  | 0  | 52        | 0         | 0  | 4         | 0 |
| HDLc - rs4815295     | 4           | 0   | 44 | 0  | 0  | 42        | 0         | 0  | 10        | 0 |
| PhysAct - rs4815295  | 64          | 0   | 28 | 0  | 0  | 6         | 0         | 0  | 2         | 0 |
| rs726164 - rs9354481 | 36          | 32  | 10 | 0  | 4  | 6         | 10        | 0  | 2         | 0 |
| rs726164 - rs340643  | 28          | 14  | 14 | 0  | 10 | 12        | 8         | 0  | 14        | 0 |

**Table S3.** Percentages of inferred edge types across 50 bootstrap samples utilizing a small subset of the considered phenotypes and genotypes. The percentages corresponding to the edge type inferred from the original dataset are highlighted in bold.

| Relationship         | $\emptyset$ | ○—○ | ←○        | —○ | ○→ | ↔         | →          | ○← | ←         | — |
|----------------------|-------------|-----|-----------|----|----|-----------|------------|----|-----------|---|
| Obesity - HOMA-IR    | 0           | 0   | 0         | 0  | 0  | 0         | <b>100</b> | 0  | 0         | 0 |
| T2D - HOMA-IR        | 0           | 0   | 0         | 0  | 10 | 0         | 8          | 0  | <b>82</b> | 0 |
| T2D - LDLc           | 0           | 10  | 0         | 0  | 6  | 2         | <b>82</b>  | 0  | 0         | 0 |
| DLP - HDLc           | 0           | 0   | 0         | 0  | 0  | 6         | 40         | 0  | <b>54</b> | 0 |
| DLP - TGL            | 0           | 0   | 0         | 0  | 4  | 2         | 4          | 0  | <b>90</b> | 0 |
| HOMA-IR - HDLc       | 38          | 0   | 4         | 0  | 0  | 12        | <b>38</b>  | 0  | 8         | 0 |
| HOMA-IR - TGL        | 0           | 0   | 0         | 0  | 0  | 22        | <b>78</b>  | 0  | 0         | 0 |
| LDLc - TGL           | 0           | 0   | 0         | 0  | 18 | <b>54</b> | 26         | 0  | 2         | 0 |
| Obesity - rs41282114 | 0           | 0   | <b>98</b> | 0  | 0  | 2         | 0          | 0  | 0         | 0 |
| HDLc - rs4815295     | 2           | 0   | <b>76</b> | 0  | 0  | 20        | 0          | 0  | 2         | 0 |

## 4 SUPPLEMENTARY TABLES

**Table S4.** Coefficient estimates, their corresponding statistics, and p-values from a logistic regression for hypertension, accounting for standard covariates (sex, age, age<sup>2</sup>, PC1, and PC2) and Obesity.

|                  | Estimate | Std. Error | z value | Pr(> z )             |
|------------------|----------|------------|---------|----------------------|
| (Intercept)      | -2.2     | 0.52       | -4.3    | $1.7 \times 10^{-5}$ |
| sex              | -0.058   | 0.19       | -0.31   | 0.75                 |
| age              | 0.032    | 0.021      | 1.5     | 0.13                 |
| age <sup>2</sup> | 0.00025  | 0.00024    | 1       | 0.3                  |
| PC1              | 26       | 21         | 1.2     | 0.22                 |
| PC2              | 16       | 27         | 0.61    | 0.54                 |
| Obesity          | 1.1      | 0.22       | 4.9     | $7.8 \times 10^{-7}$ |

**Table S5.** Coefficient estimates, their corresponding statistics, and p-values from a normal linear regression for the log-transformed levels of CRP, accounting for standard covariates (sex, age, age<sup>2</sup>, PC1, and PC2) and Obesity.

|                  | Estimate | Std. Error | t value | Pr(> t )              |
|------------------|----------|------------|---------|-----------------------|
| (Intercept)      | -3.1     | 0.21       | -15     | $6.5 \times 10^{-42}$ |
| sex              | 0.16     | 0.083      | 2       | 0.05                  |
| age              | 0.05     | 0.009      | 5.5     | $4.7 \times 10^{-8}$  |
| age <sup>2</sup> | -0.00036 | 0.0001     | -3.6    | 0.00029               |
| PC1              | 10       | 9          | 1.1     | 0.27                  |
| PC2              | -27      | 12         | -2.3    | 0.021                 |
| Obesity          | 0.6      | 0.099      | 6.1     | $2 \times 10^{-9}$    |

**Table S6.** Coefficient estimates, their corresponding statistics, and p-values from a normal linear regression for the log-transformed levels of HOMA-IR, accounting for standard covariates (sex, age, age<sup>2</sup>, PC1, and PC2) and Obesity.

|                  | Estimate             | Std. Error           | t value | Pr(> t )              |
|------------------|----------------------|----------------------|---------|-----------------------|
| (Intercept)      | 1                    | 0.13                 | 8       | $4 \times 10^{-15}$   |
| sex              | 0.013                | 0.049                | 0.27    | 0.79                  |
| age              | -0.006               | 0.0053               | -1.1    | 0.26                  |
| age <sup>2</sup> | $7.9 \times 10^{-5}$ | $5.9 \times 10^{-5}$ | 1.3     | 0.18                  |
| PC1              | -5.9                 | 5.4                  | -1.1    | 0.28                  |
| PC2              | 9.6                  | 6.9                  | 1.4     | 0.16                  |
| Obesity          | 0.72                 | 0.059                | 12      | $4.2 \times 10^{-31}$ |

**Table S7.** Coefficient estimates, their corresponding statistics, and p-values from a normal linear regression for the log-transformed levels of LDLc, accounting for standard covariates (sex, age, age<sup>2</sup>, PC1, and PC2) and T2D.

|                  | Estimate | Std. Error           | t value | Pr(> t )               |
|------------------|----------|----------------------|---------|------------------------|
| (Intercept)      | 4.1      | 0.071                | 58      | $3.3 \times 10^{-262}$ |
| sex              | 0.083    | 0.027                | 3.1     | 0.0022                 |
| age              | 0.023    | 0.003                | 7.8     | $1.9 \times 10^{-14}$  |
| age <sup>2</sup> | -0.0002  | $3.3 \times 10^{-5}$ | -6      | $4.1 \times 10^{-9}$   |
| PC1              | -2       | 3                    | -0.67   | 0.5                    |
| PC2              | 3.7      | 3.8                  | 0.97    | 0.33                   |
| T2D              | -0.11    | 0.041                | -2.6    | 0.0084                 |

**Table S8.** Coefficient estimates, their corresponding statistics, and p-values from a logistic regression for Med.T2D, accounting for standard covariates (sex, age, age<sup>2</sup>, PC1, and PC2), the confounder Obesity, and T2D.

|                  | Estimate | Std. Error        | z value | Pr(> z ) |
|------------------|----------|-------------------|---------|----------|
| (Intercept)      | -20      | $1.1 \times 10^3$ | -0.018  | 0.99     |
| sex              | 0.78     | 0.46              | 1.7     | 0.092    |
| age              | -0.12    | 0.17              | -0.69   | 0.49     |
| age <sup>2</sup> | 0.00077  | 0.0014            | 0.57    | 0.57     |
| PC1              | 94       | 71                | 1.3     | 0.19     |
| PC2              | -76      | 83                | -0.91   | 0.36     |
| T2D              | 24       | $1.1 \times 10^3$ | 0.022   | 0.98     |
| Obesity          | -0.11    | 0.47              | -0.24   | 0.81     |

**Table S9.** Coefficient estimates, their corresponding statistics, and p-values from a logistic regression for Med.HTN, accounting for standard covariates (sex, age, age<sup>2</sup>, PC1, and PC2) and HTN.

|                  | Estimate | Std. Error        | z value | Pr(> z )             |
|------------------|----------|-------------------|---------|----------------------|
| (Intercept)      | -26      | $8.3 \times 10^2$ | -0.032  | 0.98                 |
| sex              | 0.93     | 0.26              | 3.6     | 0.00032              |
| age              | 0.2      | 0.046             | 4.3     | $1.6 \times 10^{-5}$ |
| age <sup>2</sup> | -0.0015  | 0.0004            | -3.7    | 0.00024              |
| PC1              | -26      | 36                | -0.73   | 0.47                 |
| PC2              | 22       | 46                | 0.48    | 0.63                 |
| HTN              | 20       | $8.3 \times 10^2$ | 0.024   | 0.98                 |

**Table S10.** Coefficient estimates, their corresponding statistics, and p-values from a logistic regression for Med.DLP, accounting for standard covariates (sex, age, age<sup>2</sup>, PC1, and PC2) and DLP.

|                  | Estimate | Std. Error      | z value | Pr(> z ) |
|------------------|----------|-----------------|---------|----------|
| (Intercept)      | -34      | $1 \times 10^3$ | -0.034  | 0.97     |
| sex              | 0.53     | 0.31            | 1.7     | 0.086    |
| age              | 0.37     | 0.17            | 2.2     | 0.029    |
| age <sup>2</sup> | -0.0024  | 0.0013          | -1.8    | 0.064    |
| PC1              | -31      | 48              | -0.64   | 0.52     |
| PC2              | -14      | 56              | -0.26   | 0.8      |
| DLP              | 18       | $1 \times 10^3$ | 0.018   | 0.99     |

**Table S11.** Coefficient estimates, their corresponding statistics, and p-values from a normal linear regression for log-transformed levels of HOMA-IR, accounting for standard covariates (sex, age, age<sup>2</sup>, PC1, and PC2), the confounder Obesity, and CRP.

|                  | Estimate             | Std. Error           | t value | Pr(> t )              |
|------------------|----------------------|----------------------|---------|-----------------------|
| (Intercept)      | 1                    | 0.13                 | 8.1     | $2.2 \times 10^{-15}$ |
| sex              | 0.005                | 0.049                | 0.1     | 0.92                  |
| age              | -0.0076              | 0.0053               | -1.4    | 0.15                  |
| age <sup>2</sup> | $8.8 \times 10^{-5}$ | $5.9 \times 10^{-5}$ | 1.5     | 0.14                  |
| PC1              | -6.5                 | 5.4                  | -1.2    | 0.22                  |
| PC2              | 11                   | 6.8                  | 1.6     | 0.11                  |
| CRP              | 0.14                 | 0.044                | 3.1     | 0.0022                |
| Obesity          | 0.68                 | 0.06                 | 11      | $8 \times 10^{-28}$   |

**Table S12.** Coefficient estimates, their corresponding statistics, and p-values from a normal linear regression for log-transformed levels of TGL, accounting for standard covariates (sex, age, age<sup>2</sup>, PC1, and PC2), the confounder Obesity, and CRP.

|                  | Estimate | Std. Error           | t value | Pr(> t )               |
|------------------|----------|----------------------|---------|------------------------|
| (Intercept)      | 4.1      | 0.093                | 44      | $1.8 \times 10^{-200}$ |
| sex              | -0.11    | 0.036                | -3.1    | 0.002                  |
| age              | 0.029    | 0.0039               | 7.3     | $7.6 \times 10^{-13}$  |
| age <sup>2</sup> | -0.00026 | $4.3 \times 10^{-5}$ | -5.9    | $6.1 \times 10^{-9}$   |
| PC1              | -13      | 3.9                  | -3.3    | 0.00094                |
| PC2              | 9.6      | 5                    | 1.9     | 0.056                  |
| CRP              | 0.1      | 0.032                | 3.2     | 0.0012                 |
| Obesity          | 0.1      | 0.044                | 2.4     | 0.018                  |



**Table S13.** Coefficient estimates, their corresponding statistics, and p-values from a logistic regression model for Type 2 Diabetes, accounting for standard covariates (sex, age, age<sup>2</sup>, PC1, and PC2) and HOMA-IR.

|                  | Estimate | Std. Error | z value | Pr(> z )              |
|------------------|----------|------------|---------|-----------------------|
| (Intercept)      | -11      | 2          | -5.3    | $1 \times 10^{-7}$    |
| sex              | 0.3      | 0.25       | 1.2     | 0.23                  |
| age              | 0.24     | 0.065      | 3.8     | 0.00018               |
| age <sup>2</sup> | -0.0016  | 0.00054    | -3      | 0.0022                |
| PC1              | -7.4     | 33         | -0.22   | 0.82                  |
| PC2              | 21       | 42         | 0.5     | 0.62                  |
| HOMA_IR          | 0.24     | 0.037      | 6.5     | $6.4 \times 10^{-11}$ |

**Table S14.** Coefficient estimates, their corresponding statistics, and p-values from a normal linear regression for the log-transformed levels of HDLc, accounting for standard covariates (sex, age, age<sup>2</sup>, PC1, and PC2), the confounder CRP, and HOMA-IR.

|                  | Estimate             | Std. Error           | t value | Pr(> t )               |
|------------------|----------------------|----------------------|---------|------------------------|
| (Intercept)      | 3.8                  | 0.062                | 62      | $1.5 \times 10^{-278}$ |
| sex              | 0.072                | 0.024                | 3       | 0.0024                 |
| age              | -0.0057              | 0.0026               | -2.2    | 0.028                  |
| age <sup>2</sup> | $7.1 \times 10^{-5}$ | $2.9 \times 10^{-5}$ | 2.5     | 0.013                  |
| PC1              | 3.5                  | 2.6                  | 1.4     | 0.18                   |
| PC2              | -4.8                 | 3.3                  | -1.4    | 0.15                   |
| HOMA_IR          | -0.015               | 0.0036               | -4.2    | $2.8 \times 10^{-5}$   |
| CRP              | -0.067               | 0.022                | -3.1    | 0.002                  |

**Table S15.** Coefficient estimates, their corresponding statistics, and p-values from a normal linear regression for the log-transformed levels of TGL, accounting for standard covariates (sex, age, age<sup>2</sup>, PC1, and PC2), the confounder CRP, and HOMA-IR.

|                  | Estimate | Std. Error           | t value | Pr(> t )               |
|------------------|----------|----------------------|---------|------------------------|
| (Intercept)      | 4        | 0.091                | 44      | $9.5 \times 10^{-200}$ |
| sex              | -0.11    | 0.035                | -3      | 0.0024                 |
| age              | 0.028    | 0.0038               | 7.4     | $2.9 \times 10^{-13}$  |
| age <sup>2</sup> | -0.00025 | $4.2 \times 10^{-5}$ | -6      | $3.4 \times 10^{-9}$   |
| PC1              | -12      | 3.8                  | -3.2    | 0.0013                 |
| PC2              | 8.3      | 4.9                  | 1.7     | 0.087                  |
| HOMA_IR          | 0.037    | 0.0053               | 6.9     | $9 \times 10^{-12}$    |
| CRP              | 0.079    | 0.031                | 2.5     | 0.012                  |

**Table S16.** Coefficient estimates, their corresponding statistics, and p-values from a logistic regression model for DLP, accounting for standard covariates (sex, age, age<sup>2</sup>, PC1, and PC2), the confounder TGL, and HLDc.

|                  | Estimate | Std. Error | z value | Pr(> z )              |
|------------------|----------|------------|---------|-----------------------|
| (Intercept)      | 7.5      | 0.91       | 8.2     | $3.5 \times 10^{-16}$ |
| sex              | 0.97     | 0.26       | 3.8     | 0.00014               |
| age              | 0.064    | 0.027      | 2.4     | 0.017                 |
| age <sup>2</sup> | -0.00049 | 0.0003     | -1.6    | 0.1                   |
| PC1              | 30       | 25         | 1.2     | 0.24                  |
| PC2              | -44      | 32         | -1.4    | 0.17                  |
| HLDc             | -0.21    | 0.018      | -12     | $2.4 \times 10^{-33}$ |
| TGL              | 0.0048   | 0.002      | 2.4     | 0.014                 |

**Table S17.** Coefficient estimates, their corresponding statistics, and p-values from a logistic regression model for DLP, accounting for standard covariates (sex, age, age<sup>2</sup>, PC1, and PC2), the confounder CRP, and TGL.

|                  | Estimate | Std. Error | z value | Pr(> z )             |
|------------------|----------|------------|---------|----------------------|
| (Intercept)      | -1.3     | 0.45       | -3      | 0.0028               |
| sex              | 0.14     | 0.17       | 0.82    | 0.41                 |
| age              | 0.029    | 0.019      | 1.5     | 0.13                 |
| age <sup>2</sup> | -0.00029 | 0.00021    | -1.4    | 0.16                 |
| PC1              | 8.7      | 18         | 0.48    | 0.63                 |
| PC2              | -9       | 23         | -0.38   | 0.7                  |
| TGL              | 0.01     | 0.002      | 5       | $4.8 \times 10^{-7}$ |
| CRP              | 0.45     | 0.17       | 2.6     | 0.0083               |

**Table S18.** Coefficient estimates, their corresponding statistics, and p-values from a logistic regression model for Med.T2D, accounting for standard covariates (sex, age, age<sup>2</sup>, PC1, and PC2), the confounder Obesity, and Med.HTN.

|                  | Estimate | Std. Error | z value | Pr(> z )             |
|------------------|----------|------------|---------|----------------------|
| (Intercept)      | -7.9     | 1.8        | -4.4    | $1.3 \times 10^{-5}$ |
| sex              | 0.14     | 0.29       | 0.49    | 0.62                 |
| age              | 0.15     | 0.06       | 2.5     | 0.012                |
| age <sup>2</sup> | -0.0011  | 0.00052    | -2.2    | 0.027                |
| PC1              | 12       | 39         | 0.32    | 0.75                 |
| PC2              | -3.8     | 50         | -0.078  | 0.94                 |
| med.HTN          | 2.1      | 0.35       | 6.1     | $1.1 \times 10^{-9}$ |
| Obesity          | 0.16     | 0.31       | 0.51    | 0.61                 |
